# Supplementary material for: Persulfate–Based Advanced Oxidation Process for Chlorpyrifos Degradation: Mechanism, Kinetics, and Toxicity Assessment
Source: MDPI journal article supplement (doi:10.3390/toxics12030207), 2024-03-09
Supplement: s1 [file s1]

# Persulfate–Based Advanced Oxidation Process for Chlorpyrifos Degradation: Mechanism, Kinetics, and Toxicity Assessment

Youxin Xu <sup>1,2</sup>, Chenxi Zhang <sup>2</sup>, Haobing Zou <sup>2</sup>, Guangrong Chen <sup>2</sup>, Xiaomin Sun <sup>3</sup>,  
Shuguang Wang <sup>1,4,\*</sup> and Huifang Tian <sup>1,\*</sup>

<sup>1</sup> Institute of Environmental Biotechnology and Functional Materials, School of Environmental Science and Engineering, Shandong University, Qingdao 266237, China; xuyouxin@wfust.edu.cn

<sup>2</sup> Shandong Engineering Laboratory for Clean Utilization of Chemical Resources, Weifang University of Science and Technology, Weifang 262700, China; sdzhangcx@gmail.com (C.Z.); A15910058268@outlook.com (H.Z.); guangrongchen2004@outlook.com (G.C.)

<sup>3</sup> Environment Research Institute, Shandong University, Qingdao 266237, China; sxmwch@sdu.edu.cn

<sup>4</sup> Sino-French Research Institute for Ecology and Environment (ISFREE), Shandong University, Qingdao 266237, China

\* Correspondence: wsg@sdu.edu.cn (S.W.); hftian@sdu.edu.cn (H.T.)

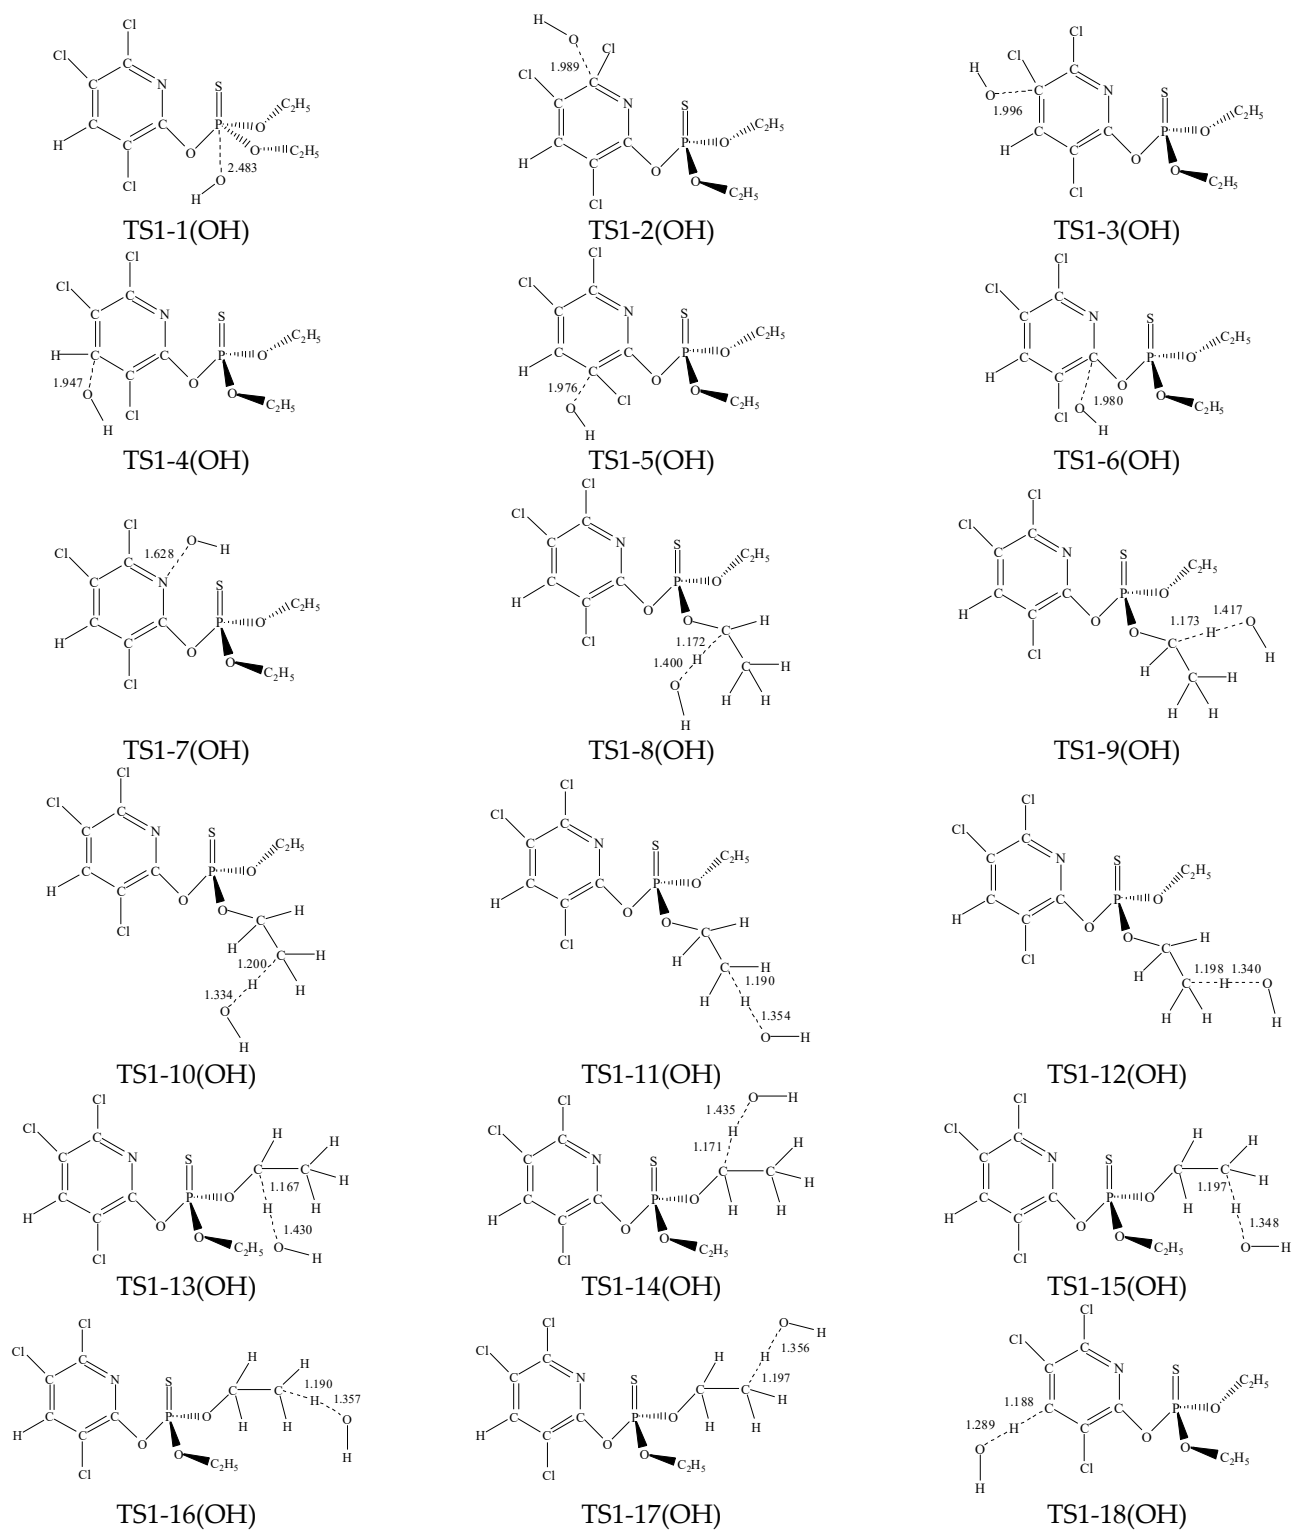

**Figure S1.** The optimized chemical conformations of TS for CPY with OH.

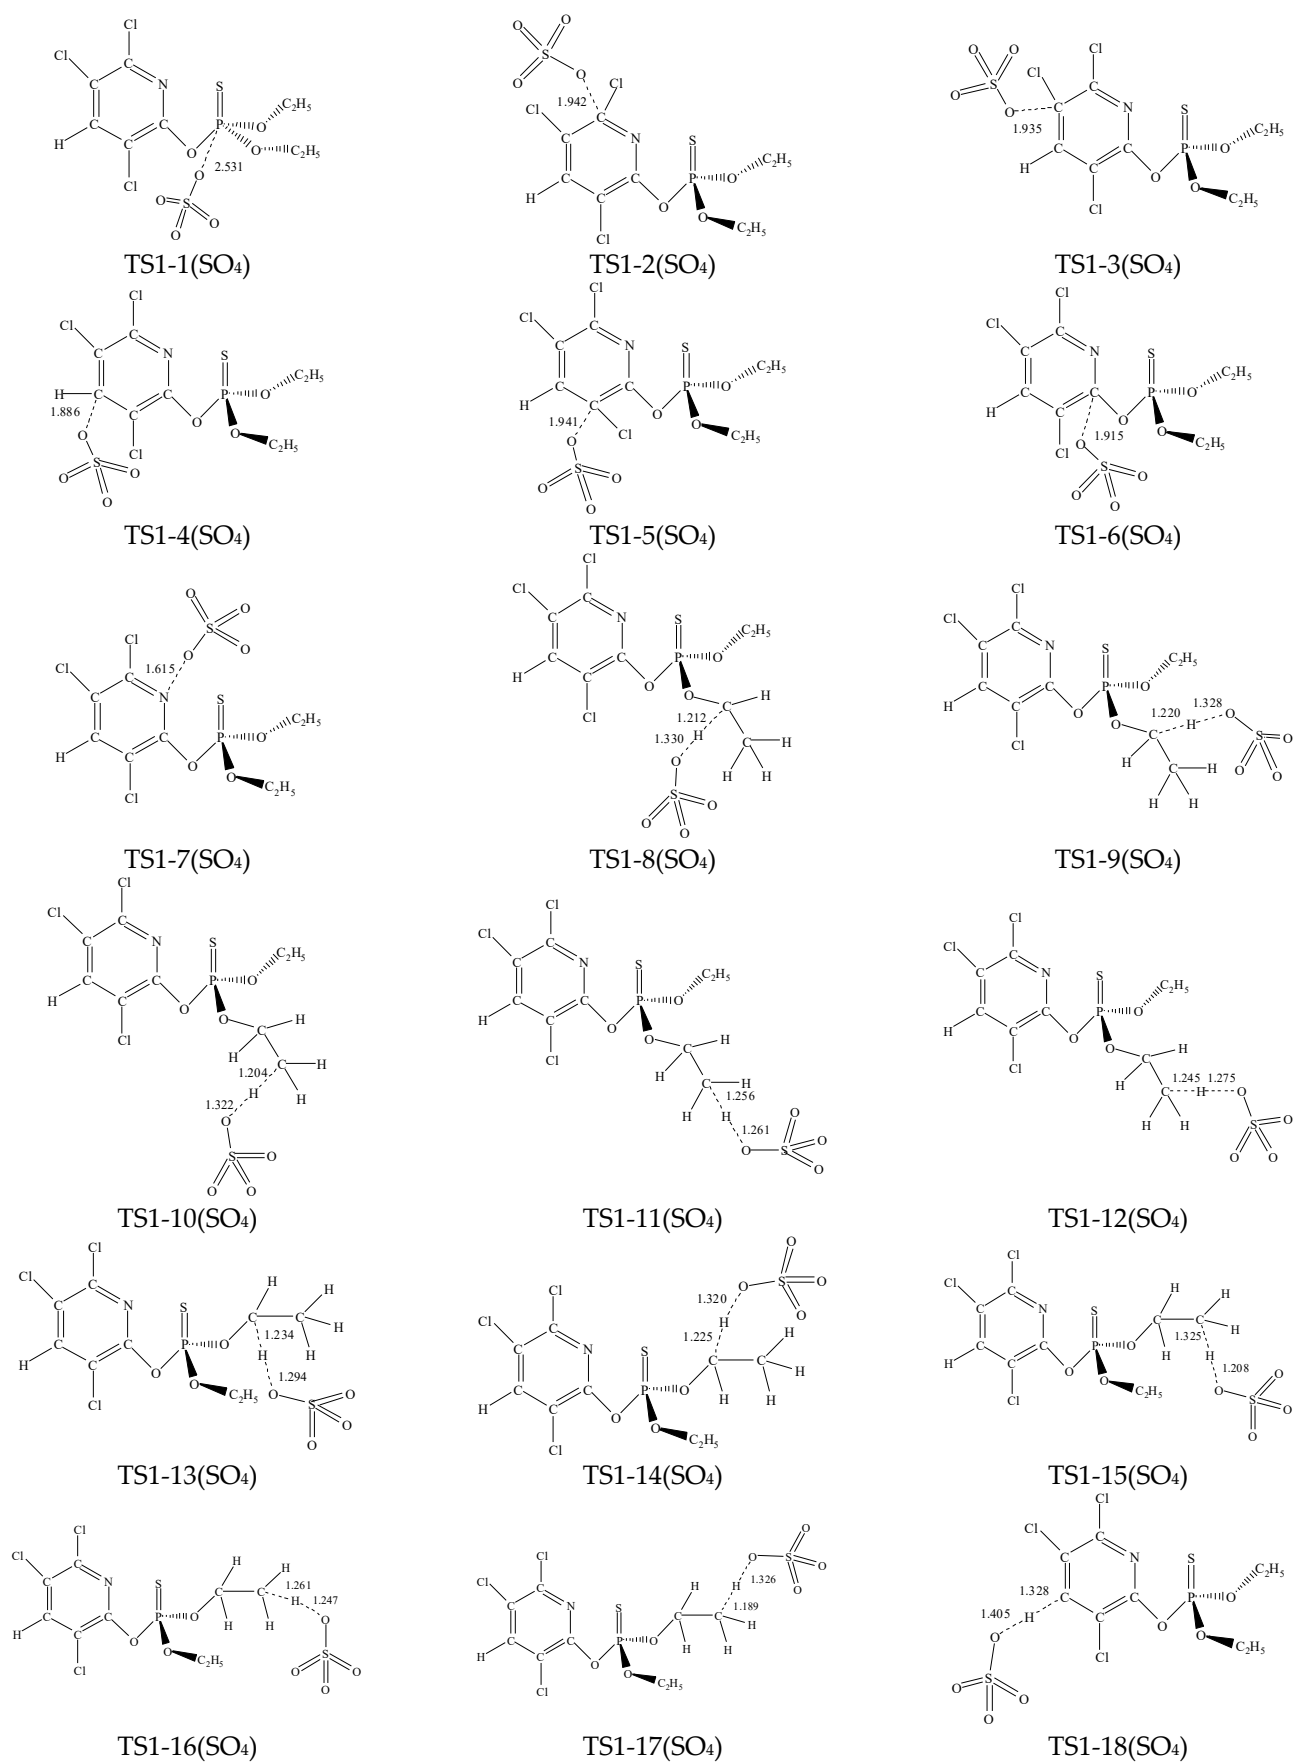

**Figure S2.** The optimized chemical conformations of TS for CPY with SO<sub>4</sub><sup>•-</sup>

**Table S1.** The bond lengths of the calculated values and the experimental values of CPY.

| Bond    | Calculated values (Å) | Experimental values (Å) | Relative errors |
|---------|-----------------------|-------------------------|-----------------|
| P1-O21  | 1.611                 | 1.647                   | 2.23%           |
| P1-O23  | 1.562                 | 1.593                   | 1.98%           |
| P1-O26  | 1.538                 | 1.59                    | 3.38%           |
| P1=S22  | 1.898                 | 1.921                   | 1.21%           |
| O23-O24 | 1.426                 | 1.447                   | 1.47%           |
| C24-C25 | 1.44                  | 1.512                   | 5.00%           |
| O26-C27 | 1.39                  | 1.442                   | 3.74%           |
| C2-C3   | 1.37                  | 1.394                   | 1.75%           |
| C3-C4   | 1.39                  | 1.394                   | 0.29%           |
| C4-C5   | 1.37                  | 1.384                   | 1.02%           |
| C5-C6   | 1.38                  | 1.403                   | 1.67%           |
| C6-N7   | 1.308                 | 1.319                   | 0.84%           |
| N7-C2   | 1.32                  | 1.321                   | 0.08%           |
| C6-O21  | 1.364                 | 1.347                   | 1.25%           |

**Table S2.** The grading standards of the acute and chronic toxicity. The unit is mg·L<sup>-1</sup>.

| Classification | Acute toxicity <sup>(1)</sup>                        | Chronic toxicity <sup>(2)</sup> |
|----------------|------------------------------------------------------|---------------------------------|
| Very toxic     | LC <sub>50</sub> ≤1 or EC <sub>50</sub> ≤1           | ChV≤0.1                         |
| Toxic          | 1<LC <sub>50</sub> ≤10 or 1<EC <sub>50</sub> ≤10     | 0.1<ChV≤1                       |
| Harmful        | 10<LC <sub>50</sub> ≤100 or 10<EC <sub>50</sub> ≤100 | 1<ChV≤10                        |
| Not harmful    | LC <sub>50</sub> >100 or EC <sub>50</sub> >100       | ChV>10                          |

Criteria set by the Chinese hazard evaluation guidelines for new chemical substances (HJ/T 154–2004). Criteria set by the European Union (described in Annex VI of Directive 67/548/EEC).

**Table S3.** The toxicity value of the main transformation intermediates and products in the degradation of CPY. The unit is mg·L<sup>-1</sup>.

|     | Molecular Structure                                                                 | ChV    |          |       | LC <sub>50</sub> |         |       |
|-----|-------------------------------------------------------------------------------------|--------|----------|-------|------------------|---------|-------|
|     |                                                                                     | Fish   | Daphnid  | Algae | Fish             | Daphnid | Algae |
| CPY | 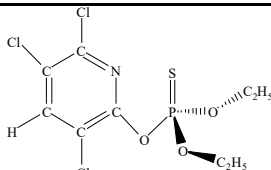 | 0.0065 | 0.000037 | 0.084 | 0.038            | 0.00019 | 0.176 |
| P1  |  | 0.132  | 0.021    | 1.35  | 1.10             | 0.836   | 1.816 |
| P2  |  | 0.359  | 0.00013  | 0.366 | 5.31             | 0.010   | 3.88  |

|       |  |       |          |       |       |         |       |
|-------|--|-------|----------|-------|-------|---------|-------|
| P3    |  | 0.015 | 0.000051 | 0.120 | 0.102 | 0.00044 | 0.338 |
| P4    |  | 245   | 83.1     | 81.9  | 3170  | 1480    | 486   |
| P5    |  | 9.05  | 4.67     | 24.2  | 30.0  | 28.2    | 85.4  |
| P6    |  | 12.1  | 0.242    | 4.20  | 29.0  | 32.6    | 15.1  |
| P7/P8 |  | 1.34  | 6.66     | 6.42  | 19.5  | 44.1    | 20.0  |

**Table S4.** Estimated health effects of CPY and its transformation intermediates and products during the degradation process.

|       | Molecular Structure | Bioaccumulation factor | Developmental Toxicity     | Mutagenicity          |
|-------|---------------------|------------------------|----------------------------|-----------------------|
| CPY   |                     | 380.62                 | Developmental toxicant     | Mutagenicity Negative |
| P1    |                     | 73.23                  | Developmental NON-toxicant | Mutagenicity Negative |
| P2    |                     | 2.66                   | Developmental NON-toxicant | Mutagenicity Negative |
| P3    |                     | 143.97                 | Developmental toxicant     | Mutagenicity Negative |
| P4    |                     | 1.26                   | Developmental NON-toxicant | Mutagenicity Negative |
| P5    |                     | 109.09                 | Developmental toxicant     | Mutagenicity Negative |
| P6    |                     | N/A                    | Developmental NON-toxicant | Mutagenicity Negative |
| P7/P8 |                     | N/A                    | Developmental toxicant     | Mutagenicity Negative |
